# Supplementary material for: The role of crystallization and crosslinking in the hysteresis loss of vulcanized Eucommia ulmoides gum
Source: Royal Society of Chemistry journal article supplement (doi:10.1039/d2ce01247b), 2022-12-02
Supplement: d2ce01247b1.pdf [file d2ce01247b1.pdf]

Supporting Information

***The Role of Crystallization and Crosslinking in the Hysteresis Loss of  
Vulcanized Eucommia Ulmoides Gum***

Bo Yang<sup>a,b</sup>, Hui Zhao<sup>a</sup>, Chunbo Zhang<sup>c</sup>, Xiuqin Zhang<sup>d</sup>, Xia Dong<sup>a,b</sup>, Guoming Liu,<sup>a,b,\*</sup> and Dujin  
Wang<sup>a,b</sup>

<sup>a</sup> CAS Key Laboratory of Engineering Plastics, Beijing National Laboratory for Molecular Sciences, Institute of Chemistry, Chinese Academy of Sciences, Beijing 100190, China

<sup>b</sup> University of Chinese Academy of Sciences, Beijing 100049, China

<sup>c</sup> SINOPEC (Beijing) Research Institute of Chemical Industry Co., Ltd., Beijing 100013, China

<sup>d</sup> Beijing Key Laboratory of Clothing Materials R & D and Assessment, Beijing Engineering Research Center of Textile Nanofiber, School of Materials Science & Engineering, Beijing Institute of Fashion Technology, Beijing 100029, China

Corresponding author: [gmliu@iccas.ac.cn](mailto:gmliu@iccas.ac.cn)

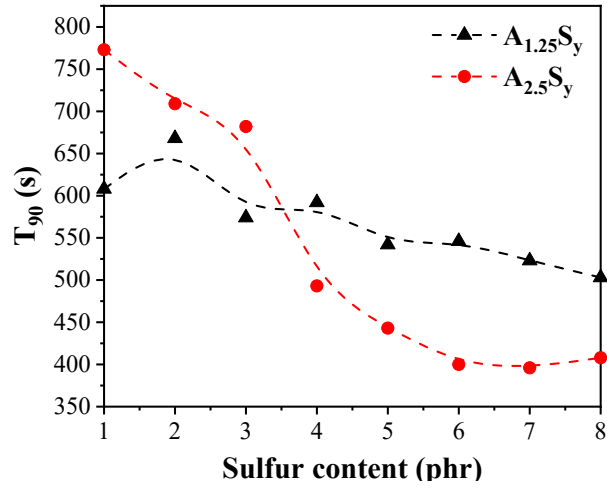

**Fig. S1.** The effect of sulfur content on the vulcanization characteristics,  $T_{90}$ .

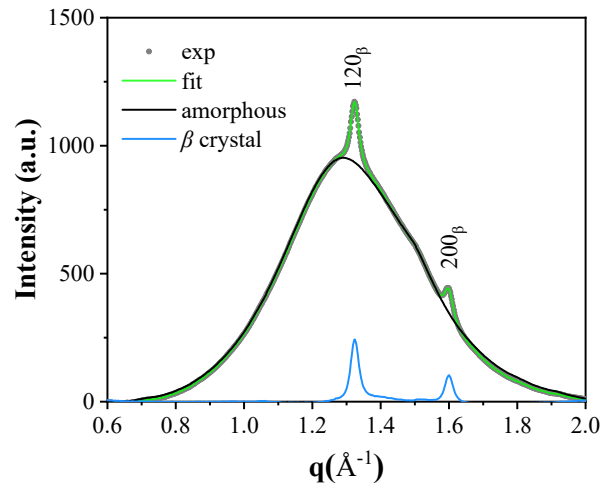

**Fig. S2.** Example illustrating the fitting of the WAXD profile of EUG vulcanizates.

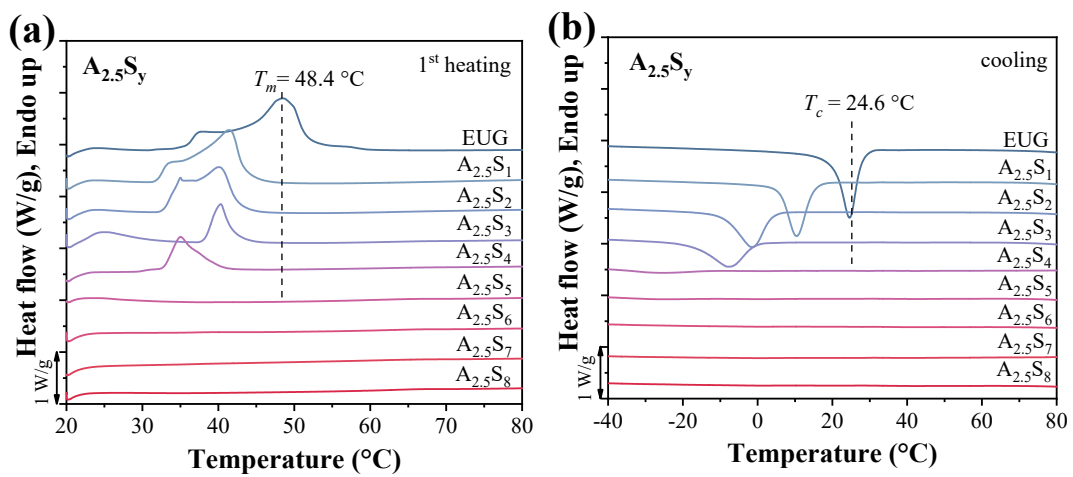

**Fig. S3.** DSC curves of  $A_{2.5}S_y$  samples, (a) the first heating process and (b) the subsequent cooling process.

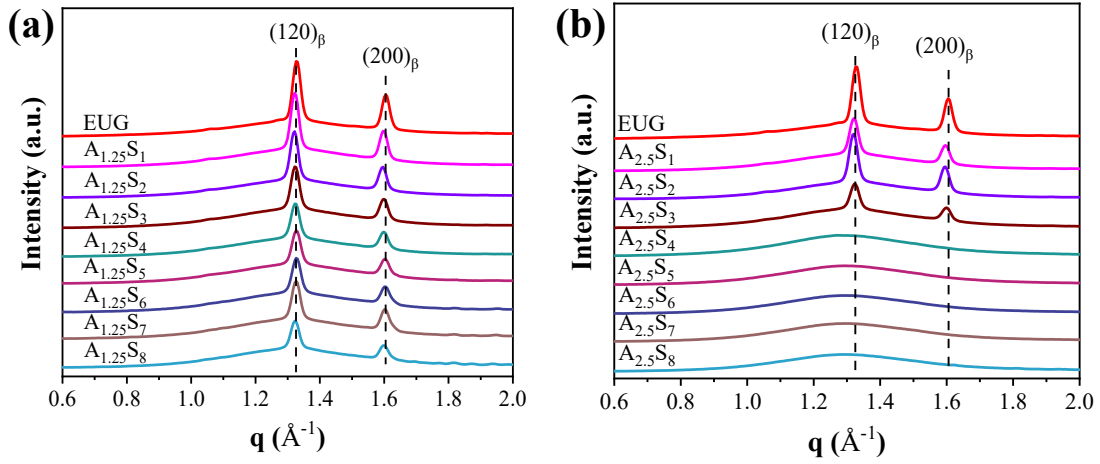

Fig. S4. 1D WAXD profiles of EUG samples, (a)  $A_{1.25}S_y$  and (b)  $A_{2.5}S_y$ .

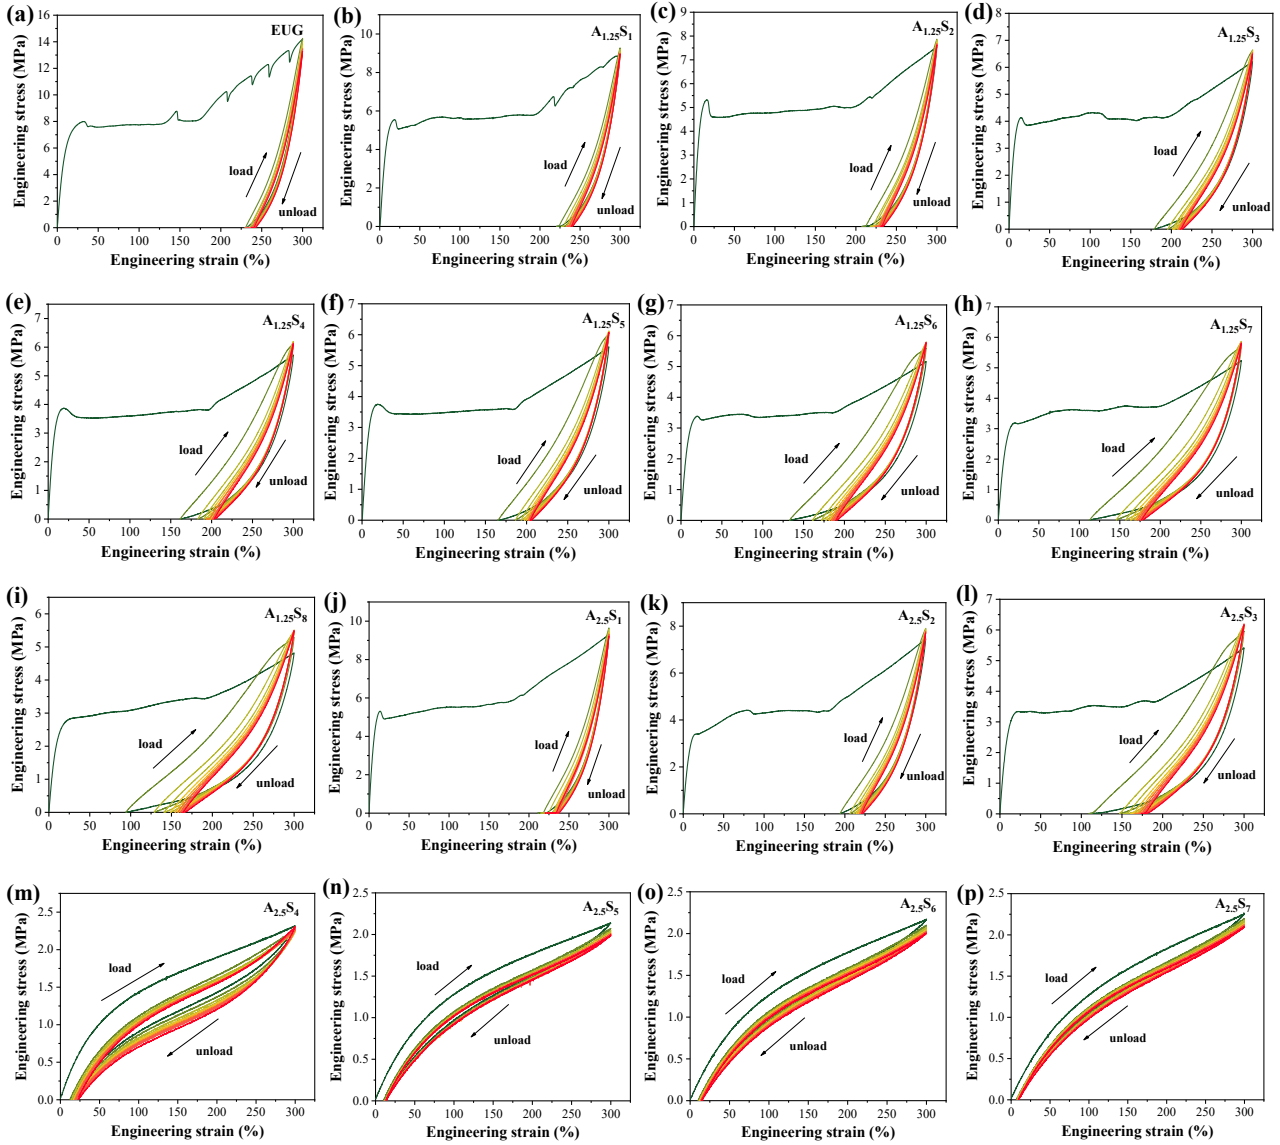

Fig. S5. The tensile loading-unloading curves of EUG samples.

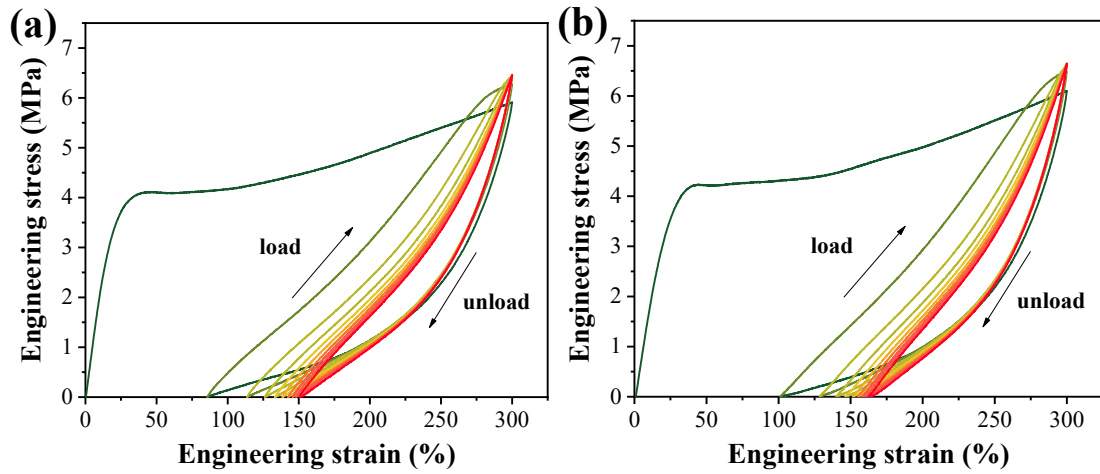

**Fig. S6.** The stress-strain curves of two additional parallel tests of cyclic deformation of  $A_{2.5}S_3$ .

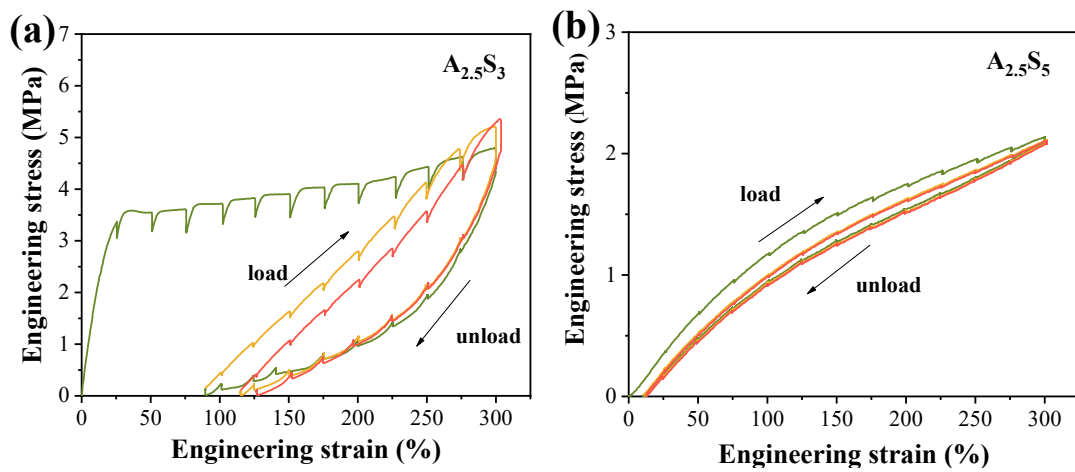

**Fig. S7.** The stress-strain curves of (a)  $A_{2.5}S_3$  and (b)  $A_{2.5}S_5$  for cyclic deformation during the *in-situ* WAXD measurements.
